# Supplementary material for: Genomic Disruption of VEGF-A Expression in Human Retinal Pigment Epithelial Cells Using CRISPR-Cas9 Endonuclease
Source: PubMed Central journal article supplement — Invest Ophthalmol Vis Sci. 2016 Oct;57(13):5490–7. doi: 10.1167/iovs.16-20296 (PMC5072539; doi:10.1167/iovs.16-20296), 2016-10
Supplement: iovs-57-11-67_s01.pdf [file iovs-57-11-67_s01.pdf]

**Supplemental Table 1. Primers for T7E1 Assay and DNA Sequencing**

| <b>Primer Name</b> | <b>Primer Sequence (5' → 3')</b> | <b>Targets</b> | <b>Assay</b>      |
|--------------------|----------------------------------|----------------|-------------------|
| VEGFA-T7E1-F-a     | CGACGGCTTGGGGAGATTGCTC           | 3, 4           | T7E1*             |
| VEGFA-T7E1-R-a     | CCCGCAGCAATCCACCCCAAAA           |                |                   |
| VEGFA-T7E1-F-b     | AGAGACGGGGTCAGAGAGAGCG           | 1, 5           | T7E1              |
| VEGFA-T7E1-R-b     | TGAGCCTCTCTCCGGGTACCCT           |                |                   |
| VEGFA-T7E1-F-c     | AGCTCCAGAGAGAAGTCGAGGA           | 2              | T7E1              |
| VEGFA-T7E1-R-c     | TGCTCAGACTTCCAGTTCGTCC           |                |                   |
| VEGFA-Dseq-F-a     | AGAGACGGGGTCAGAGAGAGCG           | 1              | Deep Sequencing   |
| VEGFA-Dseq-R-a     | TGAGCCTCTCTCCGGGTACCCT           |                |                   |
| VEGFA-Dseq-F-b     | CTGTTCTCGCTTCGGAGGAGC            | 2, 4           | Deep Sequencing   |
| VEGFA-Dseq-R-b     | CTCGGCGAGCTACTCTTCCTC            |                |                   |
| VEGFA-Dseq-F-c     | AGAGAAGGAAGAGGAGAGGGGG           | 3, 5           | Deep Sequencing   |
| VEGFA-Dseq-R-c     | CAATGCACCCAAGACAGCAGAA           |                |                   |
| VEGFA-Sseq-1       | TGACGGACAGACAGACAGACAC           | 1              | Sanger Sequencing |
| VEGFA-Sseq-2       | AAAGTTCATGGTTTTCGGAGGCC          | 2              | Sanger Sequencing |
| VEGFA-Sseq-3       | GCACCCAAGACAGCAGAAAGTT           | 3              | Sanger Sequencing |
| VEGFA-Sseq-4       | CTTACCTTGGCATGGTGGAGGT           | 4              | Sanger Sequencing |
| VEGFA-Sseq-5       | AGGGGCAAAGTGAGTGACCTG            | 5              | Sanger Sequencing |

\*T7 endonuclease I assay

## Supplemental Fig. 1

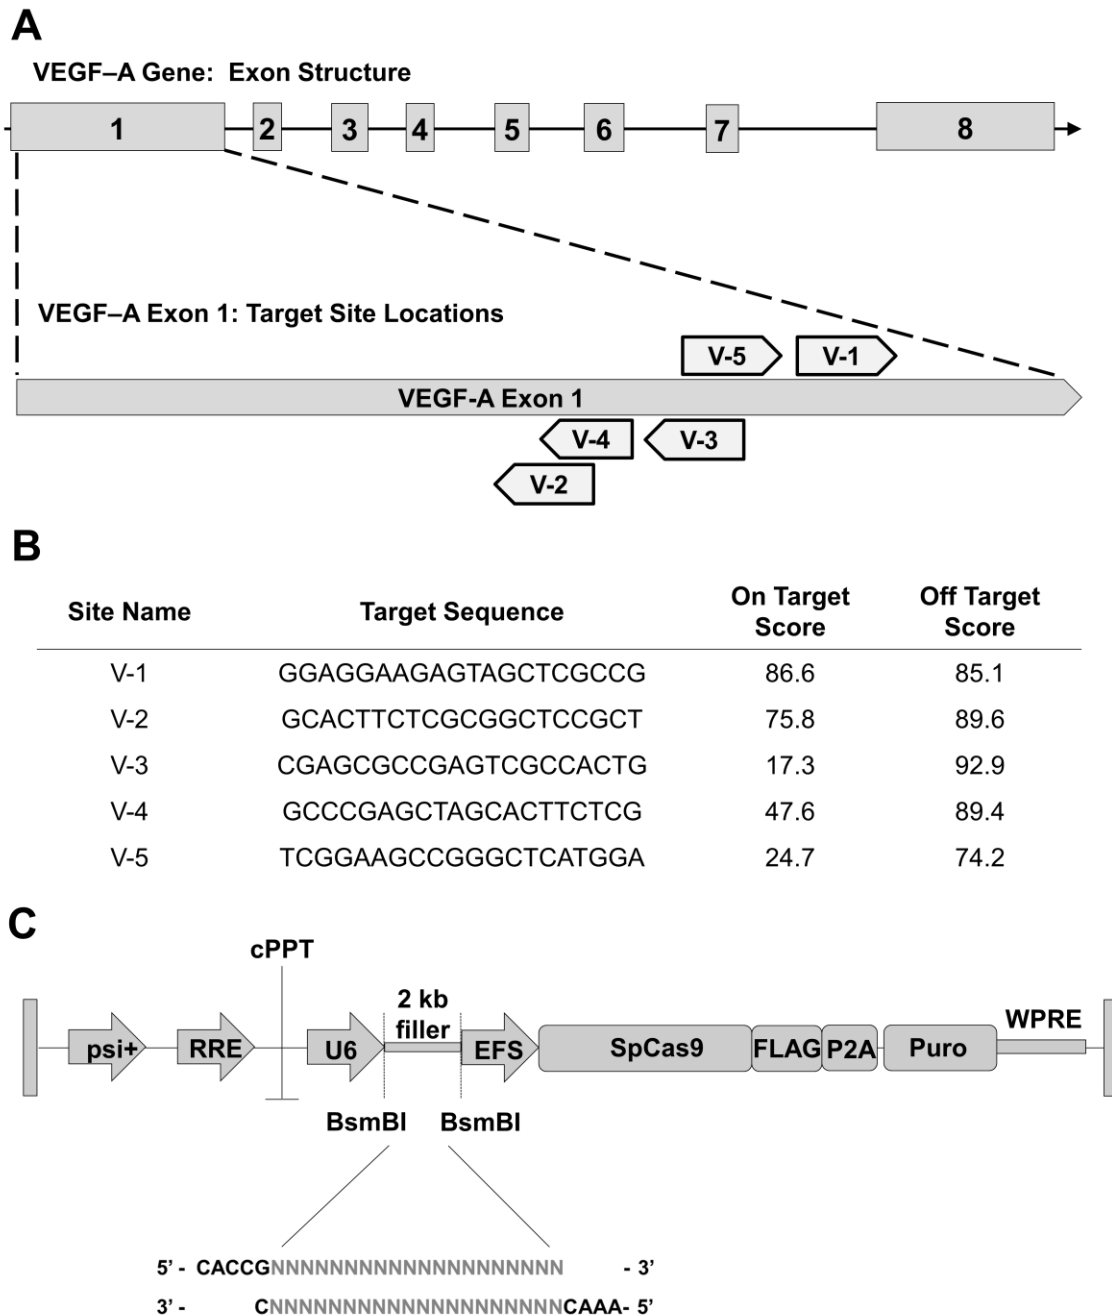

**Supplemental Figure 1. Target CRISPR sequences for VEGF-A gene and lentiviral vector design.**

(A) Schematic diagram of the VEGF-A gene structure and target CRISPR sequences

located in exon 1. (B) Target CRISPR sequences with on-target and off-target scores to

predict Cas9 activity and probability of off-target binding, respectively. (C) Schematic of LentiCRISPRv2 lentiviral vector, which includes *Strep pyogenes* Cas9 endonuclease (SpCas9) and a guide RNA (gRNA) cassette with BsmBI restriction sites for insertion of target CRISPR sequences. Abbreviations: psi+, Psi packaging signal; RRE, Rev response element; cPPT, central polypurine tract; U6, U6 promoter; EFS, elongation factor 1 $\alpha$  short promoter; FLAG, Flag octapeptide tag; P2A, 2A self-cleaving peptide; Puro, puromycin selection marker; WPRE, woodchuck post-transcriptional regulatory element.

## Supplemental Fig. 2

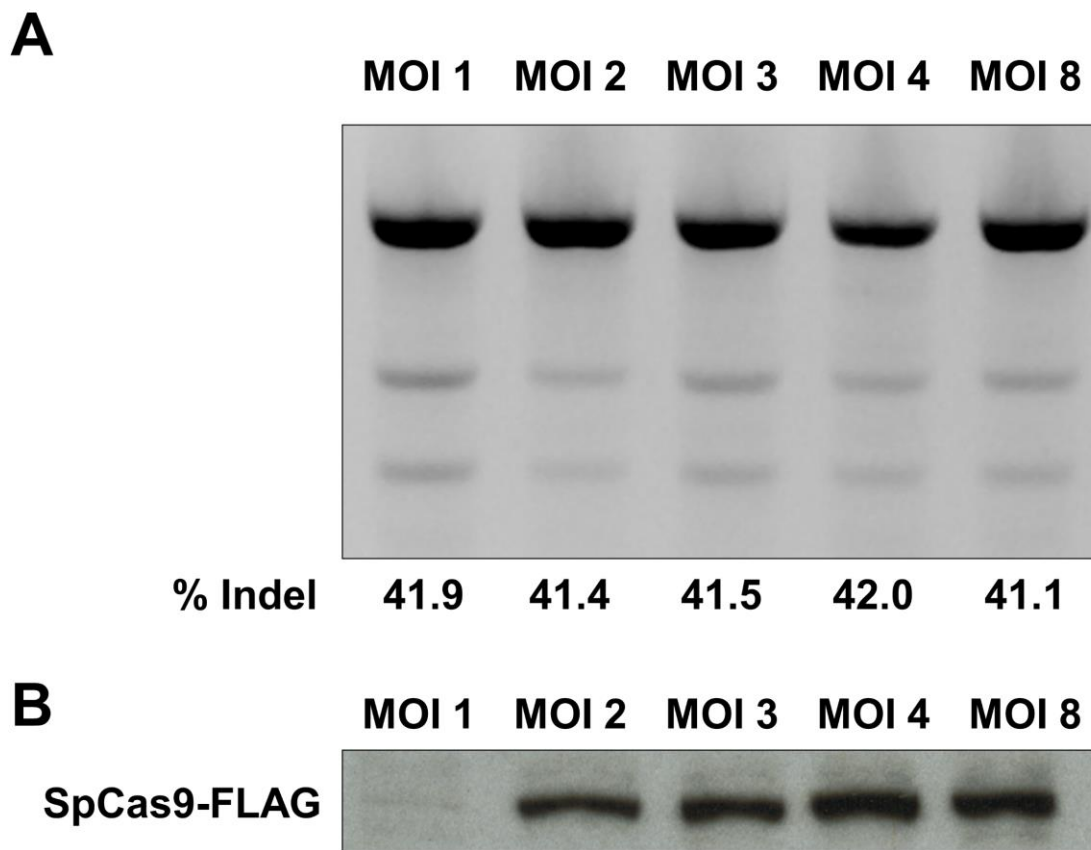

### Supplemental Figure 2. Indel formation at different viral concentrations.

(A) T7E1 mismatch detection assay showing similar frequencies of indel formation in VEGF-A at increasing viral concentrations, expressed as multiplicity of infection (MOI). (B) Western blot demonstrating greater SpCas9-FLAG expression at increasing viral concentrations, using rabbit anti-FLAG primary antibody (1:500, F7425, Sigma-Aldrich, St. Louis, MO), and rabbit HRP-linked IgG secondary antibody (1:5000, NA934, GE Life Sciences, Pittsburgh, PA), followed by development with a chemiluminescent reagent (Amersham ECL, GE Life Sciences, Pittsburgh, PA). Greater viral concentrations resulted in toxicity and cell death.

### Supplemental Fig. 3

|           |                      |   |  |           |                       |   |     |
|-----------|----------------------|---|--|-----------|-----------------------|---|-----|
| V-2       | PAM                  | ▼ |  | V-3       | PAM                   | ▼ |     |
| Wild Type | CCGAGCCGAGCGGAGCCGCG |   |  | Wild Type | CCGCAGTGGCGACTCGGCGC  |   |     |
|           | CCGAGCCGAGCGGAGCCGCG |   |  |           | CCGCAGTTGGCGACTCGGCGC |   |     |
|           | CCGAGCCG-----CG      |   |  |           | CCGCAG-GGCGACTCGGCGC  |   |     |
|           | CCGAGCCGAGCG-AGCCGCG |   |  |           | C-----GACTCGGCGC      |   |     |
|           | CCGAGCCGAG-----CCGCG |   |  |           | CCGCAG---CGACTCGGCGC  |   |     |
|           | -----GGAAGCCGCG      |   |  |           | CCGCAG--GCGACTCGGCGC  |   |     |
|           | CCGAGCCGAG-----      |   |  |           | CCGCAGGTGGCGACTCGGCGC |   |     |
|           | CCGAGCCGAGCCGAG-CGCG |   |  |           | CCGCAGTGTGGCGACTCGGC  |   |     |
|           | CCGAGCCGA-----GCG    |   |  |           | CCGCAG-CTGGCGACTCGGC  |   |     |
|           | CCGAGCCGAGCTTCCCGCG  |   |  |           | CCGCAGA-TGGCGACTCGGC  |   |     |
|           | -----GGGAGCCGCG      |   |  |           | CCGC--TGGCGACTCGGCGC  |   |     |
|           | C-----CG             |   |  |           | CCGCAGA-----G         |   |     |
|           | CCGAG-----           |   |  |           | CCGC-----ACTCGGC      |   |     |
|           | -----CGCGGGGAGCCGCG  |   |  |           | CCGCAG-----CTCGGC     |   |     |
|           | CCGAGCCGAG-----CGCG  |   |  |           | CCGCA-TGGCGACTCGGCGC  |   |     |
|           | CCGAGCCGAGCTTCCC---- |   |  |           |                       |   |     |
| V-4       | PAM                  | ▼ |  | V-5       |                       | ▼ | PAM |
| Wild Type | CCGCGAGAAGTGCTAGCTCG |   |  | Wild Type | GAAGCCGGGCTCATGGACGG  |   |     |
|           | CCGCGAAGAAGTGCTAGCTC |   |  |           | GAAGCCGGGCTCATTTGGACG |   |     |
|           | CCGCGACGAAGTGCTAGCTC |   |  |           | GAAGCCGGGCTCATATGGAC  |   |     |
|           | CCGC--GAAGTGCTAGCTCG |   |  |           | GAAGCC-----GGACG      |   |     |
|           | CCGCGATGAAGTGCTAGCTC |   |  |           | -----CTCGGAAGCCG      |   |     |
|           | CGCGGGGAAGTGCTAGCTC  |   |  |           | GAAGCCGGG-----ACGG    |   |     |
|           | CCGCG-GAAGTGCTAGCTCG |   |  |           | GAAGCCGGGCTCATTTGGAC  |   |     |
|           | CCGCGAGGAAGTGCTAGCTC |   |  |           | -----CTCGGAGGACG      |   |     |
|           | GGGGGAAGCCGAGCTAGCTC |   |  |           |                       |   |     |

### Supplemental Figure 3. Deep sequencing reveals Cas9-mediated VEGF-A gene disruption.

Representative deep sequencing results for V-2, V-3, V-4, and V-5 confirming indel formation at the predicted cut site (red arrowhead), including insertions (bases in red) and deletions (dashes).
